# Supplementary material
Source: ML conference proceedings conference paper supplement (https://openreview.net/forum?id=twmHKU3Ds4)
Supplement: supplementary_material [file attachment]

## A Appendix

### A.1 Broader Impact and Limitations

This work, alone with the related prior works in self-supervised speech representation learning discussed, focused on English speech, thereby implying the potential risks associated with neglecting other languages, especially the low-resource languages. Nevertheless, we provide a preliminary result on other languages in §A.5 to mitigate the problem as much as possible.

### A.2 Discussion on online clustering

**Codebook initialization.** The initialization of codebook  $\mathbf{E}^k \in \mathbb{R}^{V \times D}$  can be critical in vector quantization methods [11]. We tried different initializations including

- $\mathbf{E}^k \sim \mathcal{N}(0, \mu)$  where  $\mu \in \{1, \frac{1}{\sqrt{D}}\}$ ,
- $\mathbf{E}^k \sim \mathcal{N}(0, 1)$  followed by L2 normalization  $\frac{\mathbf{e}_v^k}{\|\mathbf{e}_v^k\|_2}$ .

In practice, we found different initialization leads to different codebook perplexity at the beginning of training. Nevertheless, the methods all lead to similar codebook perplexity at the end of training and downstream performance. This also demonstrated the stability of gradient-free online VQ in oppose to standard VQ.

**Input for quantization.** We found normalizing the teacher model representation  $\tilde{\mathbf{z}}_t^k$  is necessary for stable clustering. We briefly summarized the results using different normalization methods:

- Instance normalization (IN; default): this can be interpreted as a parameter-free utterance-wise normalization for each channel, we found it stable.
- Batch normalization (BN): this can be viewed as a dataset-wise version of IN which yields a similar result but introduces additional parameters tracking the running stats.
- L2 normalization: a frame-wise normalization along the feature dimension, results in a more unstable codebook perplexity and code collapse occasionally.

In addition, we also tried combining targets from different layers (i.e.,  $\sum_k \tilde{\mathbf{z}}_t^k$  with a single codebook across all layers) before clustering following Baevski et al. [9]. This model performed significantly worse in the downstream fine-tuning task.

**Dealing with inactive codewords.** Note that the codebook update policy

$$\begin{aligned} \mathbf{s}_v^k &\leftarrow \tau \mathbf{s}_v^k + (1 - \tau) \sum \tilde{\mathbf{z}}_v^k, \\ n_v^k &\leftarrow \tau n_v^k + (1 - \tau) |\tilde{\mathbf{z}}_v^k|, \\ \mathbf{e}_v^k &\leftarrow \frac{\mathbf{s}_v^k}{n_v^k}, \end{aligned} \tag{3}$$

updates each codeword  $\mathbf{e}_v^k$  regardless of whether the codeword activate (i.e., having at least one neighbor  $|\tilde{\mathbf{z}}_v^k| \geq 1$ ) or not. In the extreme case where a codeword remains inactive for a long period, we have  $\mathbf{s}_v^k \rightarrow \vec{0}$  and  $n_v^k \rightarrow 0$  which results in numerical instability or code collapse. In practice, we found freezing the inactivate codewords with

$$\tau_v^k = \begin{cases} \tau, & \text{if } |\tilde{\mathbf{z}}_v^k| \geq 1 \\ 1, & \text{otherwise} \end{cases}, \tag{5}$$

leads to a slightly better codebook perplexity but the improvement diminishes as the batch size increases.

464 **Simplifying codeword update policy.** A simplified version of online clustering described in Eq.3  
 465 is to only track the averaged embedding without the size

$$\mathbf{e}_v^k \leftarrow \tau \mathbf{e}_v^k + (1 - \tau) \frac{\sum \tilde{\mathbf{z}}_v^k}{|\tilde{\mathbf{z}}_v^k|}. \quad (6)$$

466 The simplified version enforces equal momentum for each step regardless of the size of the neighbor  
 467 set  $|\tilde{\mathbf{z}}_v^k|$ . In practice, we found using Eq. 3 more stable and results in slightly better performance with  
 468 a negligible cost.

### 469 A.3 Pseudo-code for DinoSR training

---

#### Algorithm 1 PyTorch pseudocode for DinoSR

---

```
# teacher, student: student and teacher networks
# phi[k]: DxV cluster prediction matrix for k-th layer codebook
# codebook[k]: VxD codebook matrix for k-th layer
# code_sum[k]: VxD unnormalized codebook matrix for k-th layer
# code_cnt[k]: Vx1 codeword counter for k-th layer
# lbd, tau: decay rates of teacher network, codebook
teacher.weight = student.weight

for x in dataset: # mini audio batch BxT

    # Eq.1: teacher EMA
    teacher.weight = lbd * teacher.weight + \
        (1-lbd) * student.weight

    z = student(mask(x)) # BxTxD, last layer only
    z = z[mask_position] # MxD
    with torch.no_grad(): # gradient-free syntax
        z_tilde = teacher(x) # KxBxTxD, all K layers
        z_tilde = z_tilde[:,mask_position] # KxMxD

    loss = 0
    for k in range(K-N,K):

        with torch.no_grad():
            # Eq.2: online clustering
            d = -framewiseL2(z_tilde[k], codebook[k])
            target_cls = hardmax(d, dim=-1) # MxV

            # Eq.3: codebook learning
            code_sum[k] = tau * code_sum[k] + \
                (1-tau) * matmul(target_cls.T, z_tilde)
            code_cnt[k] = tau * code_cnt[k] + \
                (1-tau) * target_cls.sum(dim=0)
            codebook[k] = code_sum[k] / code_cnt[k]

            # Eq.4: cluster prediction
            p_v = phi[k](z) # MxV
            loss += cross_entropy(p_v, target_cls)

    loss.backward()
    student.step()
```

---

### 470 A.4 Additional results and analysis

471 **Visualizing phone-code correlation.** To further demonstrate the difference between DinoSR and  
 472 prior works with online codebook learning, we visualized the conditional probability  $P(\text{phone}|\text{code})$   
 473 computed using Co-training APC<sup>2</sup> [29] and Vector-Quantized Autoregressive Predictive Coding  
 474 (VQ-APC)<sup>3</sup> [12] following the exact same setup used in Figure 4. Clearly, DinoSR is able to capture  
 475 the long-tail distribution better, and the codewords tend to be more concentrated to the most correlated  
 476 phone when compared against the prior works.

<sup>2</sup>Model checkpoint from <https://github.com/30stomercury/autoregressive-co-training>

<sup>3</sup>Code from <https://github.com/iamyuanchung/VQ-APC>

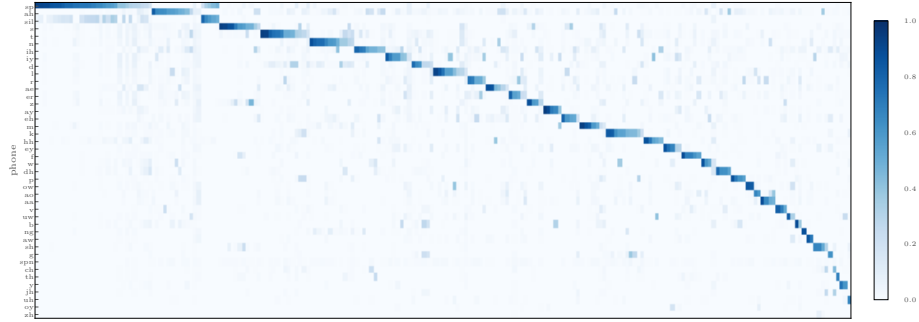

Figure 6:  $P(\text{phone}|\text{code})$  from DinoSR with 217 codewords activated out of 256.

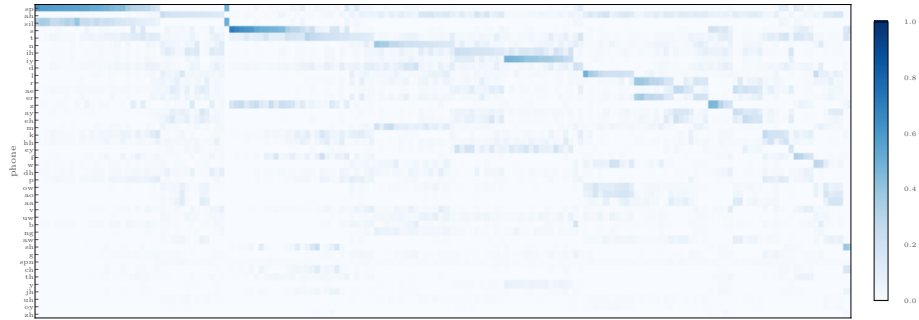

Figure 7:  $P(\text{phone}|\text{code})$  from Co-training APC [29] with 164 codewords activated out of 256.

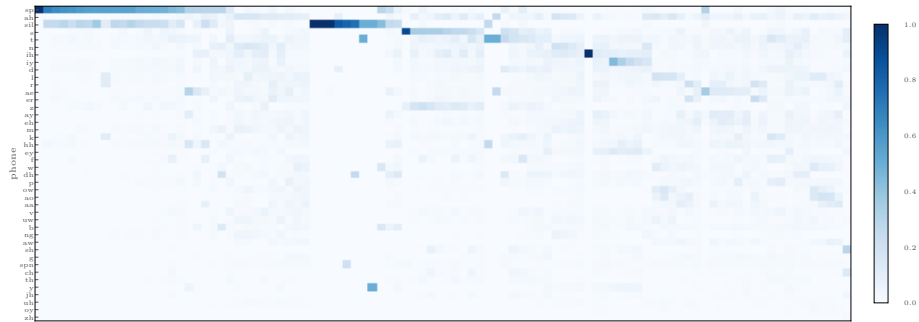

Figure 8:  $P(\text{phone}|\text{code})$  from VQ-APC [12] with 98 codewords activated out of 512.

Figure 9 and figure 10 provided another view of the codeword distribution over the phone set. Each codeword is assigned to a single phone based on the most correlated phone (i.e.,  $\text{argmax}_{\text{phone}} P(\text{phone}|\text{code})$ ). We derive the learned phone distribution by accumulating the occurrence of all codewords and compare to the ground truth. Results show the distribution of codewords from DinoSR is very close to the ground truth, while other methods failed to capture the underlying distribution by over-assigning codewords to the more frequent phones and dropping the less frequent phones.

**Finding the best codebook.** By examining phone-normalized mutual information, code perplexity, and ABX score in acoustic unit discovery in each layer, we can see that the 5th layer of the teacher model consistently performed the best. However, this is only considering phones as the ideal discrete unit. A more throughout study on the content of each layer is left as future work.

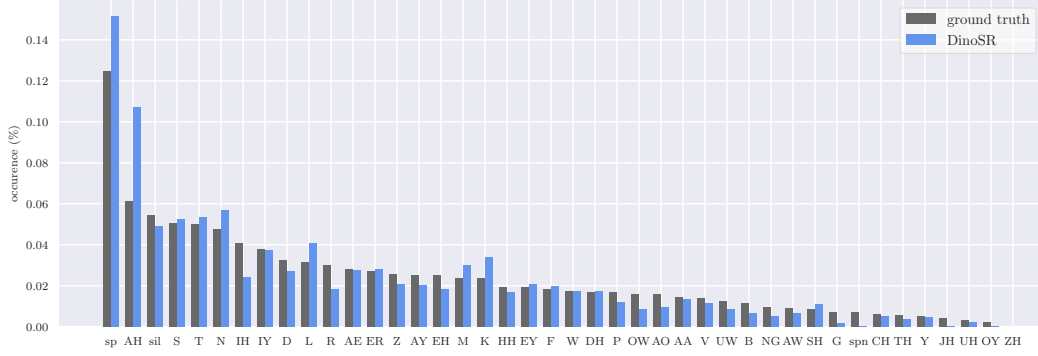

Figure 9: Histogram of phones and codewords.

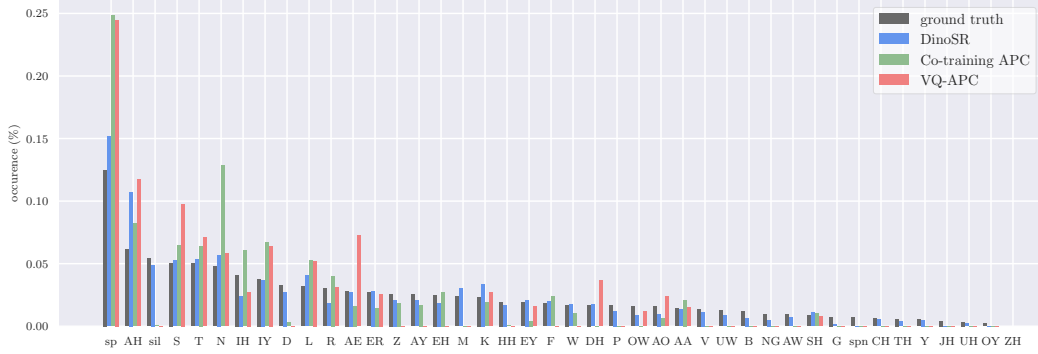

Figure 10: Histogram of phones and codewords.

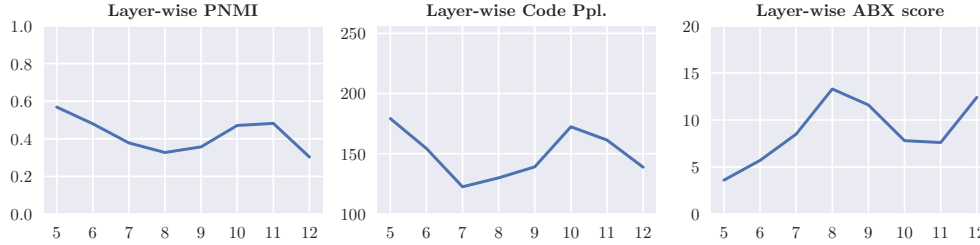

Figure 11: Layer-wise phone-normalized mutual information, code perplexity, and ABX score in acoustic unit discovery.

## 488 A.5 Preliminary Result on Multi-lingual Speech

489 We conducted a preliminary experiment under limited computing budget to showcase that our method  
 490 can be generalized to other languages. We followed the setting in multi-lingual speech representation  
 491 learning [42, 43] to pre-train DinoSR on 10 different languages (Bengali, Cantonese, Georgian,  
 492 Haitian, Kurmanji, Pashto, Tamil, Turkish, Tokpisin, Vietnamese) on the BABEL dataset [44] and  
 493 fine-tune on 4 different unseen languages (Assamese, Tagalog, Swahili, Lao). In this setup we trained  
 494 our model for 200k steps on 4 GPUs with a total batch size of 16 minutes. We report Character Error  
 495 Rate (CER) on the fine-tuning languages in Table 6.

Table 6: Character Error Rate (WER) on BABEL dataset.

| Model                                    | Pre-training steps | Batch size (minutes) | Fine-tuning Language |         |         |      |
|------------------------------------------|--------------------|----------------------|----------------------|---------|---------|------|
|                                          |                    |                      | Assamese             | Tagalog | Swahili | Lao  |
| Seq-to-seq ASR without pre-training [42] | -                  | -                    | 41.3                 | 37.9    | 29.1    | 38.7 |
| XLRSR-10 [43]                            | 250k               | 96                   | 29.4                 | 21.9    | 16.6    | 23.3 |
| DinoSR                                   | 200k               | 16                   | 27.2                 | 19.4    | 14.6    | 22.8 |

496 Inspired by the International Phonetic Alphabet [45] which defined a universal set of acoustic units  
 497 across different languages, we take a look into how DinoSR acoustic units derived from the 10  
 498 pre-training languages are distributed. Interestingly, we found the acoustic units are more likely to be  
 499 shared across different languages as shown in Table 7.

Table 7: Codeword distribution over different languages from BABEL dataset. Each cell corresponded to the proportion of codewords activated in  $n$  languages, e.g., 86.5% of the codewords emerged in all 10 languages for the 5th layer.

| Layer | $n$ languages |      |      |      |      |      |      |      |      |       |
|-------|---------------|------|------|------|------|------|------|------|------|-------|
|       | 1             | 2    | 3    | 4    | 5    | 6    | 7    | 8    | 9    | 10    |
| 5th   | 0.0%          | 0.0% | 4.5% | 1.7% | 1.1% | 0.6% | 1.1% | 3.4% | 1.1% | 86.5% |
| 6th   | 0.0%          | 0.0% | 2.9% | 1.7% | 1.7% | 1.7% | 1.7% | 1.7% | 2.9% | 85.5% |
| 7th   | 0.7%          | 0.7% | 4.0% | 1.3% | 1.3% | 0.7% | 3.4% | 4.0% | 7.4% | 76.5% |
| 8th   | 0.0%          | 0.0% | 1.9% | 2.6% | 1.3% | 0.6% | 1.3% | 2.6% | 1.9% | 87.8% |
| 9th   | 0.0%          | 0.0% | 2.4% | 1.8% | 1.8% | 1.2% | 0.6% | 1.2% | 3.6% | 87.4% |
| 10th  | 0.0%          | 0.0% | 1.8% | 1.2% | 1.2% | 0.0% | 0.6% | 1.2% | 1.8% | 92.1% |
| 11th  | 0.0%          | 0.0% | 1.9% | 0.6% | 0.0% | 0.6% | 0.0% | 2.5% | 1.9% | 92.5% |
| 12th  | 0.0%          | 0.0% | 0.0% | 0.0% | 0.0% | 0.0% | 0.6% | 1.2% | 0.6% | 97.6% |

500 In conclusion, preliminary results on BABEL show that DinoSR can be applied to languages other  
 501 than English. Moreover, learning acoustic units from different languages is possible even with a  
 502 shared vocabulary.
